# Supplementary material for: Prevalence, Virulence Gene Distribution and Alarming the Multidrug Resistance of Aeromonas hydrophila Associated with Disease Outbreaks in Freshwater Aquaculture
Source: MDPI journal article supplement (doi:10.3390/antibiotics10050532), 2021-05-04
Supplement: s1 [file s1]

**Table S1. Biochemical characterization of *A. hydrophila* in the present study**

| Tests                                                    | <i>A. hydrophila</i> isolates in the present study |                 |                               | <i>A. hydrophila</i><br>ATCC 7966<br>(1) |
|----------------------------------------------------------|----------------------------------------------------|-----------------|-------------------------------|------------------------------------------|
|                                                          | Tilapia<br>(n=187)                                 | Carp<br>(n=156) | Channel<br>catfish<br>(n=115) |                                          |
| Growth on RS medium (small, smooth, and yellow colonies) | 187                                                | 156             | 115                           | +                                        |
| Cell morphology rods                                     | 187                                                | 156             | 115                           | +                                        |
| Motility                                                 | 187                                                | 156             | 115                           | +                                        |
| Catalase                                                 | 187                                                | 156             | 115                           | +                                        |
| Cytochrome oxidase (OX)                                  | 187                                                | 156             | 115                           | +                                        |
| Voges–Proskauer (VP)                                     | 155                                                | 136             | 97                            | +                                        |
| Haemolysis of sheep RBCs                                 | 187                                                | 156             | 115                           | +                                        |
| Sensitivity to 0/129 (150µg)                             | 187                                                | 156             | 115                           | +                                        |
| Indole production (IND)                                  | 148                                                | 129             | 97                            | +                                        |
| Urease production (URE)                                  | 0                                                  | 0               | 0                             | -                                        |
| Citrate utilization (CIT)                                | 162                                                | 139             | 93                            | +                                        |
| Glucose fermentation                                     | 158                                                | 145             | 101                           | +                                        |
| H <sub>2</sub> S production                              | 145                                                | 148             | 97                            | +                                        |
| Arginine dihydrolase (ADH)                               | 187                                                | 156             | 115                           | +                                        |
| Lysine decarboxylase (LDC)                               | 187                                                | 156             | 115                           | +                                        |
| Ornithine decarboxylase (ODC)                            | 0                                                  | 0               | 0                             | -                                        |
| Melibiose fermentation (MEL)                             | 0                                                  | 0               | 0                             | -                                        |
| Amygdalin fermentation (AMY)                             | 24                                                 | 19              | 14                            | -                                        |
| Arabinose fermentation (ARA)                             | 173                                                | 138             | 101                           | +                                        |
| Inositol fermentation (INO)                              | 28                                                 | 21              | 12                            | -                                        |
| Mannitol fermentation (MAN)                              | 154                                                | 146             | 93                            | +                                        |
| Tryptophane deaminase (TDA)                              | 0                                                  | 0               | 0                             | -                                        |
| Gelatin hydrolysis (GEL)                                 | 165                                                | 135             | 91                            | +                                        |

**Table S2. The identities of gyrB and rpoB sequences from *A. hydrophila* in present study and those of *A. hydrophila* ATCC ATCC 7966**

| Isolates | gyrB (%) | rpoB (%) | Isolates  | gyrB (%) | rpoB (%) | Isolates  | gyrB (%) | rpoB (%) | Isolates      | gyrB (%) | rpoB (%) |
|----------|----------|----------|-----------|----------|----------|-----------|----------|----------|---------------|----------|----------|
| Til-LC01 | 99.2     | 98.8     | Til-HD06  | 99.2     | 98.8     | Carp-VP02 | 99.1     | 98.6     | Carp-TB02     | 99.2     | 98.8     |
| Til-LC02 | 99.1     | 98.6     | Til-HD07  | 99.1     | 98.8     | Carp-VP03 | 99.1     | 98.4     | Carp-TB03     | 99.2     | 99.03    |
| Til-LC03 | 99.1     | 98.8     | Til-HD08  | 99.1     | 99.03    | Carp-VP04 | 99.1     | 98.6     | Carp-TB04     | 99.1     | 98.8     |
| Til-LC04 | 99.1     | 98.8     | Til-HY01  | 99.1     | 98.8     | Carp-VP05 | 99.1     | 98.6     | Carp-TB05     | 99.1     | 98.8     |
| Til-SL01 | 99.1     | 98.8     | Til-HY02  | 99.1     | 99.03    | Carp-BG01 | 99.2     | 98.6     | Carp-TB06     | 99.1     | 98.8     |
| Til-SL02 | 99.1     | 99.03    | Til-HY03  | 99.1     | 98.6     | Carp-BG02 | 99.1     | 98.4     | Chanfish-LC01 | 99.1     | 99.03    |
| Til-SL03 | 99.1     | 98.8     | Til-HY04  | 99.1     | 98.6     | Carp-BG03 | 99.1     | 98.6     | Chanfish-LC02 | 99.1     | 98.8     |
| Til-SL04 | 99.2     | 99.03    | Til-HB01  | 99.2     | 98.6     | Carp-BG04 | 99.1     | 98.6     | Chanfish-SL01 | 99.1     | 99.03    |
| Til-SL05 | 99.2     | 98.6     | Til-HB02  | 99.1     | 98.4     | Carp-BG05 | 99.1     | 98.6     | Chanfish-SL02 | 99.2     | 98.6     |
| Til-SL06 | 99.2     | 98.6     | Til-HB03  | 99.1     | 98.6     | Carp-BG06 | 99.1     | 98.8     | Chanfish-YB01 | 99.1     | 98.6     |
| Til-YB01 | 99.2     | 98.6     | Til-HB04  | 99.1     | 98.6     | Carp-BG07 | 99.2     | 98.6     | Chanfish-YB02 | 99.1     | 98.6     |
| Til-YB02 | 99.2     | 98.4     | Til-HB05  | 99.1     | 98.6     | Carp-BN01 | 99.2     | 98.8     | Chanfish-YB03 | 99.1     | 98.4     |
| Til-YB03 | 99.1     | 98.6     | Til-HB06  | 99.1     | 98.4     | Carp-BN02 | 99.2     | 98.8     | Chanfish-YB04 | 99.1     | 98.6     |
| Til-YB04 | 99.1     | 98.6     | Til-HN01  | 99.2     | 98.6     | Carp-BN03 | 99.2     | 98.8     | Chanfish-YB05 | 99.1     | 98.6     |
| Til-YB05 | 99.1     | 98.6     | Til-HN02  | 99.2     | 98.6     | Carp-BN04 | 99.2     | 99.03    | Chanfish-YB06 | 99.2     | 98.6     |
| Til-YB06 | 99.1     | 98.8     | Til-HN03  | 99.2     | 98.6     | Carp-BN05 | 99.1     | 98.8     | Chanfish-YB07 | 99.1     | 98.4     |
| Til-YB07 | 99.1     | 98.6     | Til-HN04  | 99.2     | 98.8     | Carp-BN06 | 99.1     | 98.8     | Chanfish-YB08 | 99.1     | 98.6     |
| Til-TQ01 | 99.1     | 98.8     | Til-HN05  | 99.2     | 98.6     | Carp-QN01 | 99.1     | 98.8     | Chanfish-YB09 | 99.1     | 98.6     |
| Til-TQ02 | 99.2     | 98.8     | Til-HN06  | 99.1     | 98.8     | Carp-QN02 | 99.1     | 99.03    | Chanfish-TQ01 | 99.1     | 98.6     |
| Til-TQ03 | 99.2     | 98.8     | Til-TH01  | 99.1     | 98.8     | Carp-QN03 | 99.1     | 98.8     | Chanfish-TQ02 | 99.1     | 98.8     |
| Til-TQ04 | 99.2     | 99.03    | Til-TH02  | 99.1     | 98.8     | Carp-QN04 | 99.1     | 99.03    | Chanfish-PT01 | 99.2     | 98.6     |
| Til-TQ05 | 99.2     | 98.8     | Til-TH03  | 99.1     | 99.03    | Carp-QN05 | 99.2     | 98.6     | Chanfish-PT02 | 99.2     | 98.8     |
| Til-TQ06 | 99.2     | 99.03    | Til-TH04  | 99.1     | 98.8     | Carp-QN06 | 99.1     | 98.6     | Chanfish-VP01 | 99.2     | 98.8     |
| Til-TQ07 | 99.1     | 98.6     | Til-TH05  | 99.1     | 99.03    | Carp-HD01 | 99.1     | 98.6     | Chanfish-VP02 | 99.2     | 98.8     |
| Til-TQ08 | 99.1     | 98.6     | Til-NA01  | 99.2     | 98.6     | Carp-HD02 | 99.1     | 98.4     | Chanfish-BG01 | 99.2     | 99.03    |
| Til-PT01 | 99.1     | 98.6     | Til-NA02  | 99.1     | 98.6     | Carp-HD03 | 99.1     | 98.6     | Chanfish-BG02 | 99.1     | 98.6     |
| Til-PT02 | 99.1     | 98.4     | Til-NA03  | 99.1     | 98.6     | Carp-HD04 | 99.1     | 98.6     | Chanfish-BN01 | 99.1     | 98.8     |
| Til-PT03 | 99.1     | 98.6     | Til-NA04  | 99.1     | 98.4     | Carp-HD05 | 99.2     | 98.6     | Chanfish-BN02 | 99.1     | 98.8     |
| Til-PT04 | 99.1     | 98.6     | Til-NA05  | 99.1     | 98.8     | Carp-HD06 | 99.1     | 98.4     | Chanfish-BN03 | 99.1     | 98.8     |
| Til-PT05 | 99.2     | 98.6     | Til-NA06  | 99.1     | 98.8     | Carp-HY01 | 99.1     | 98.6     | Chanfish-BN04 | 99.1     | 99.03    |
| Til-VP01 | 99.2     | 98.6     | Til-TB01  | 99.1     | 98.8     | Carp-HY02 | 99.1     | 98.6     | Chanfish-BN05 | 99.1     | 98.8     |
| Til-VP02 | 99.2     | 98.6     | Til-TB02  | 99.2     | 99.03    | Carp-HY03 | 99.1     | 98.6     | Chanfish-BN06 | 99.2     | 98.8     |
| Til-VP03 | 99.2     | 98.6     | Til-TB03  | 99.1     | 98.8     | Carp-HY04 | 99.1     | 98.8     | Chanfish-QN01 | 99.1     | 98.8     |
| Til-VP04 | 99.1     | 98.4     | Til-TB04  | 99.1     | 99.03    | Carp-HB01 | 99.2     | 98.6     | Chanfish-QN02 | 99.1     | 99.03    |
| Til-VP05 | 99.1     | 98.6     | Carp-LC01 | 99.1     | 98.6     | Carp-HB02 | 99.2     | 98.8     | Chanfish-HD01 | 99.1     | 98.8     |
| Til-BG01 | 99.1     | 98.6     | Carp-LC02 | 99.1     | 98.6     | Carp-HB03 | 99.2     | 98.8     | Chanfish-HD02 | 99.1     | 99.03    |
| Til-BG02 | 99.1     | 98.6     | Carp-LC03 | 99.1     | 98.6     | Carp-HB04 | 99.2     | 98.8     | Chanfish-HD03 | 99.1     | 98.6     |

|          |      |       |           |      |       |           |      |       |               |      |       |
|----------|------|-------|-----------|------|-------|-----------|------|-------|---------------|------|-------|
| Til-BG03 | 99.1 | 98.8  | Carp-LC04 | 99.1 | 98.4  | Carp-HB05 | 99.2 | 99.03 | Chanfish-HD04 | 99.2 | 98.6  |
| Til-BG04 | 99.2 | 98.6  | Carp-LC05 | 99.2 | 98.6  | Carp-HB06 | 99.1 | 98.8  | Chanfish-HD05 | 99.1 | 98.6  |
| Til-BG05 | 99.2 | 98.8  | Carp-SL01 | 99.1 | 98.6  | Carp-HB07 | 99.1 | 98.8  | Chanfish-HD06 | 99.1 | 98.4  |
| Til-BG06 | 99.2 | 98.8  | Carp-SL02 | 99.2 | 98.6  | Carp-HN01 | 99.1 | 98.8  | Chanfish-HD07 | 99.1 | 98.6  |
| Til-BN01 | 99.2 | 98.8  | Carp-SL03 | 99.1 | 98.4  | Carp-HN02 | 99.1 | 99.03 | Chanfish-HY01 | 99.1 | 98.6  |
| Til-BN02 | 99.2 | 99.03 | Carp-SL04 | 99.1 | 98.6  | Carp-HN03 | 99.1 | 98.8  | Chanfish-HY02 | 99.1 | 98.6  |
| Til-BN03 | 99.1 | 98.8  | Carp-YB01 | 99.1 | 98.6  | Carp-HN04 | 99.1 | 99.03 | Chanfish-HB01 | 99.2 | 98.4  |
| Til-BN04 | 99.1 | 99.03 | Carp-YB02 | 99.1 | 98.6  | Carp-HN05 | 99.2 | 98.6  | Chanfish-HB02 | 99.2 | 98.6  |
| Til-BN05 | 99.1 | 98.6  | Carp-YB03 | 99.1 | 98.8  | Carp-HN06 | 99.1 | 98.6  | Chanfish-HN01 | 99.2 | 98.6  |
| Til-BN06 | 99.1 | 98.6  | Carp-YB04 | 99.2 | 98.6  | Carp-HN07 | 99.1 | 98.6  | Chanfish-HN02 | 99.2 | 98.6  |
| Til-QN01 | 99.1 | 98.6  | Carp-YB05 | 99.2 | 98.8  | Carp-HN08 | 99.1 | 98.4  | Chanfish-TH01 | 99.2 | 98.8  |
| Til-QN02 | 99.1 | 98.4  | Carp-YB06 | 99.2 | 98.8  | Carp-TH01 | 99.1 | 98.6  | Chanfish-TH02 | 99.1 | 98.6  |
| Til-QN03 | 99.2 | 98.6  | Carp-TQ01 | 99.2 | 98.8  | Carp-TH02 | 99.1 | 98.6  | Chanfish-NA01 | 99.1 | 98.8  |
| Til-QN04 | 99.1 | 98.6  | Carp-TQ02 | 99.2 | 99.03 | Carp-TH03 | 99.2 | 98.6  | Chanfish-NA02 | 99.1 | 98.8  |
| Til-QN05 | 99.1 | 98.6  | Carp-TQ03 | 99.1 | 98.8  | Carp-TH04 | 99.1 | 98.4  | Chanfish-TB01 | 99.1 | 98.8  |
| Til-QN06 | 99.1 | 98.4  | Carp-TQ04 | 99.1 | 98.8  | Carp-TH05 | 99.1 | 98.6  | Chanfish-TB02 | 99.1 | 99.03 |
| Til-QN07 | 99.1 | 98.6  | Carp-TQ05 | 99.1 | 98.8  | Carp-NA01 | 99.1 | 98.6  | Chanfish-TB03 | 99.1 | 98.6  |
| Til-HD01 | 99.1 | 98.6  | Carp-PT01 | 99.1 | 99.03 | Carp-NA02 | 99.1 | 98.6  | Chanfish-TB04 | 99.2 | 98.6  |
| Til-HD02 | 99.2 | 98.6  | Carp-PT02 | 99.1 | 98.8  | Carp-NA03 | 99.1 | 98.8  | Chanfish-TB05 | 99.1 | 98.4  |
| Til-HD03 | 99.2 | 98.8  | Carp-PT03 | 99.1 | 99.03 | Carp-NA04 | 99.2 | 98.6  | Chanfish-TB06 | 99.1 | 98.6  |
| Til-HD04 | 99.2 | 98.6  | Carp-PT04 | 99.2 | 98.6  | Carp-NA05 | 99.2 | 98.8  | Chanfish-TB07 | 99.1 | 98.6  |
| Til-HD05 | 99.2 | 98.8  | Carp-VP01 | 99.1 | 98.6  | Carp-TB01 | 99.2 | 98.8  | Chanfish-TB08 | 99.1 | 98.6  |

**Table S3.** Primers used for the detection of virulence genes in *A. hydrophila*

| Gene        | DNA sequence (5'→3')        | Product size (bp) | Tm(°C) | References |
|-------------|-----------------------------|-------------------|--------|------------|
| <i>act</i>  | F: AGAAGGTGACCACCACCAAGAACA | 232               | 65     | [33]       |
|             | R: AACTGACATCGGCCTTGAACTC   |                   |        |            |
| <i>alt</i>  | F: TGACCCAGTCCTGGCACGGC     | 442               | 64     | [33]       |
|             | R: GGTGATCGATCACCACCAGC     |                   |        |            |
| <i>ast</i>  | F: TCTCCATGCTTCCCTTCCACT    | 331               | 63     | [33]       |
|             | R: GTGTAGGGATTGAAGAAGCCG    |                   |        |            |
| <i>aerA</i> | F: CCTATGGCCTGAGCGAGAAG     | 431               | 63     | [34]       |
|             | R: CCAGTTCCAGTCCCACCACT     |                   |        |            |
| <i>hlyA</i> | F: GGCCGGTGGCCGAAGATACGGG   | 597               | 62     | [32]       |
|             | R: GGCGGCGCCGGACGAGACGGG    |                   |        |            |
